# Supplementary material for: Selective Chemical Vapor Deposition Growth of WS2/MoS2 Vertical and Lateral Heterostructures on Gold Foils
Source: MDPI journal article supplement (doi:10.3390/nano12101696), 2022-05-16
Supplement: s1 [file s1]

# Selective Chemical Vapor Deposition Growth of WS<sub>2</sub>/MoS<sub>2</sub> Vertical and Lateral Heterostructures on Gold Foils

Zixuan Wang <sup>1,2</sup>, Wenshuo Xu <sup>2,3,\*</sup>, Benxuan Li <sup>2,4</sup>, Qiaoyan Hao <sup>2</sup>, Di Wu <sup>2</sup>, Dianyu Qi <sup>2</sup>, Haibo Gan <sup>2</sup>, Junpeng Xie <sup>1</sup>, Guo Hong <sup>1,5,\*</sup>, and Wenjing Zhang <sup>2,\*</sup>

<sup>1</sup> Institute of Applied Physics and Materials Engineering, University of Macau, Avenida da Universidade, Taipa 999078, Macau; yb87822@umac.mo (Z.W.); jepsenxie@foxmail.com (J.X.)

<sup>2</sup> International Collaborative Laboratory of 2D Materials for Optoelectronics Science and Technology of Ministry of Education, Institute of Microscale Optoelectronics, Shenzhen University, Shenzhen 518060, China; bl398@cam.ac.uk (B.L.); hqy@szu.edu.cn (Q.H.); physicswudi@163.com (D.W.); qidianyuqi@sina.com (D.Q.); ganhaibo@szu.edu.cn (H.G.)

<sup>3</sup> Department of Physics, National University of Singapore, 2 Science Drive 3, Singapore, 117551, Singapore

<sup>4</sup> Electrical Engineering Division, Engineering Department, University of Cambridge, 9 JJ Thomson Avenue, Cambridge, CB3 0FA, UK

<sup>5</sup> Department of Physics and Chemistry, Faculty of Science and Technology, University of Macau, Avenida da Universidade, Taipa 999078, Macau

\* Correspondence: wensxu@nus.edu.sg (W.X.); ghong@um.edu.mo (G.H.); wjzhang@szu.edu.cn (W.Z.)

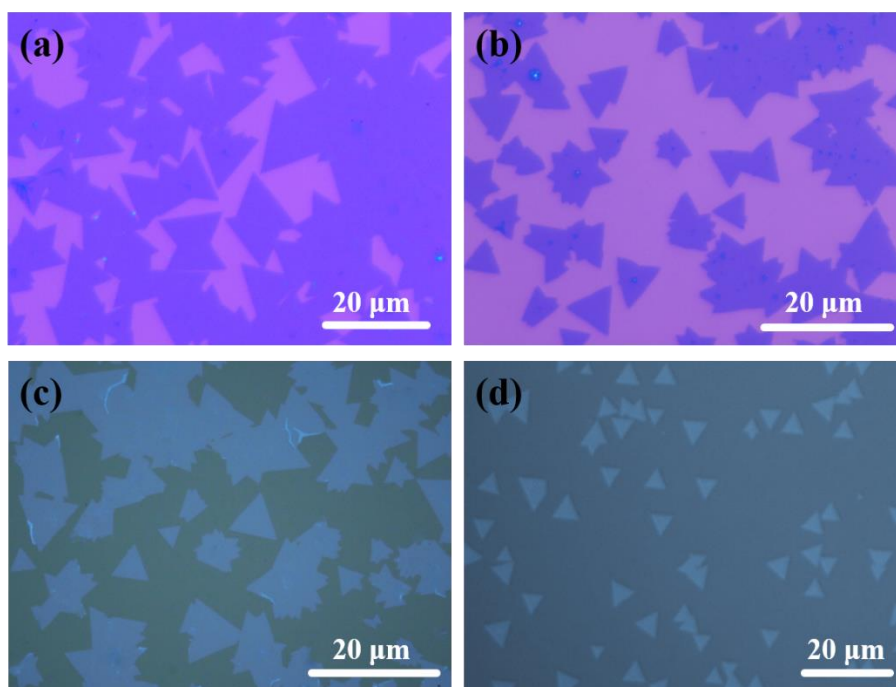

**Figure S1.** Typical optical microscopic images of monolayer MoS<sub>2</sub> and WS<sub>2</sub> domains grown on different substrates. (a) MoS<sub>2</sub> grown on SiO<sub>2</sub>/Si at 750 °C for 20 min. (b) WS<sub>2</sub> grown on SiO<sub>2</sub>/Si at 850 °C for 15 min. (c) MoS<sub>2</sub> grown on c-sapphire at 750 °C for 20 min. (d) WS<sub>2</sub> grown on c-sapphire at 850 °C for 15 min.

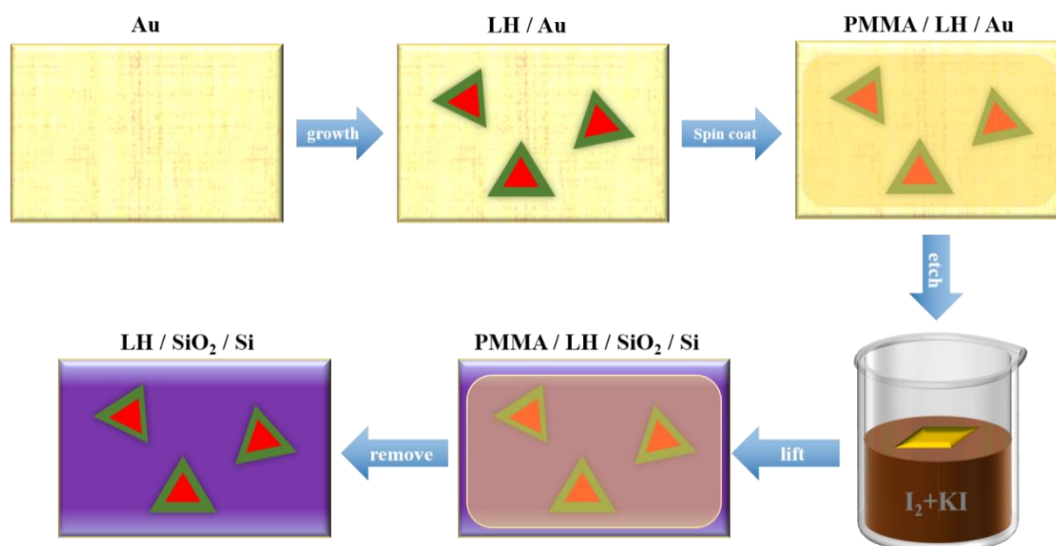

**Figure S2.** Schematic diagrams of the growth of WS<sub>2</sub>/MoS<sub>2</sub> LHs on Au foil and wet transfer from the Au foil onto a SiO<sub>2</sub>/Si substrate.

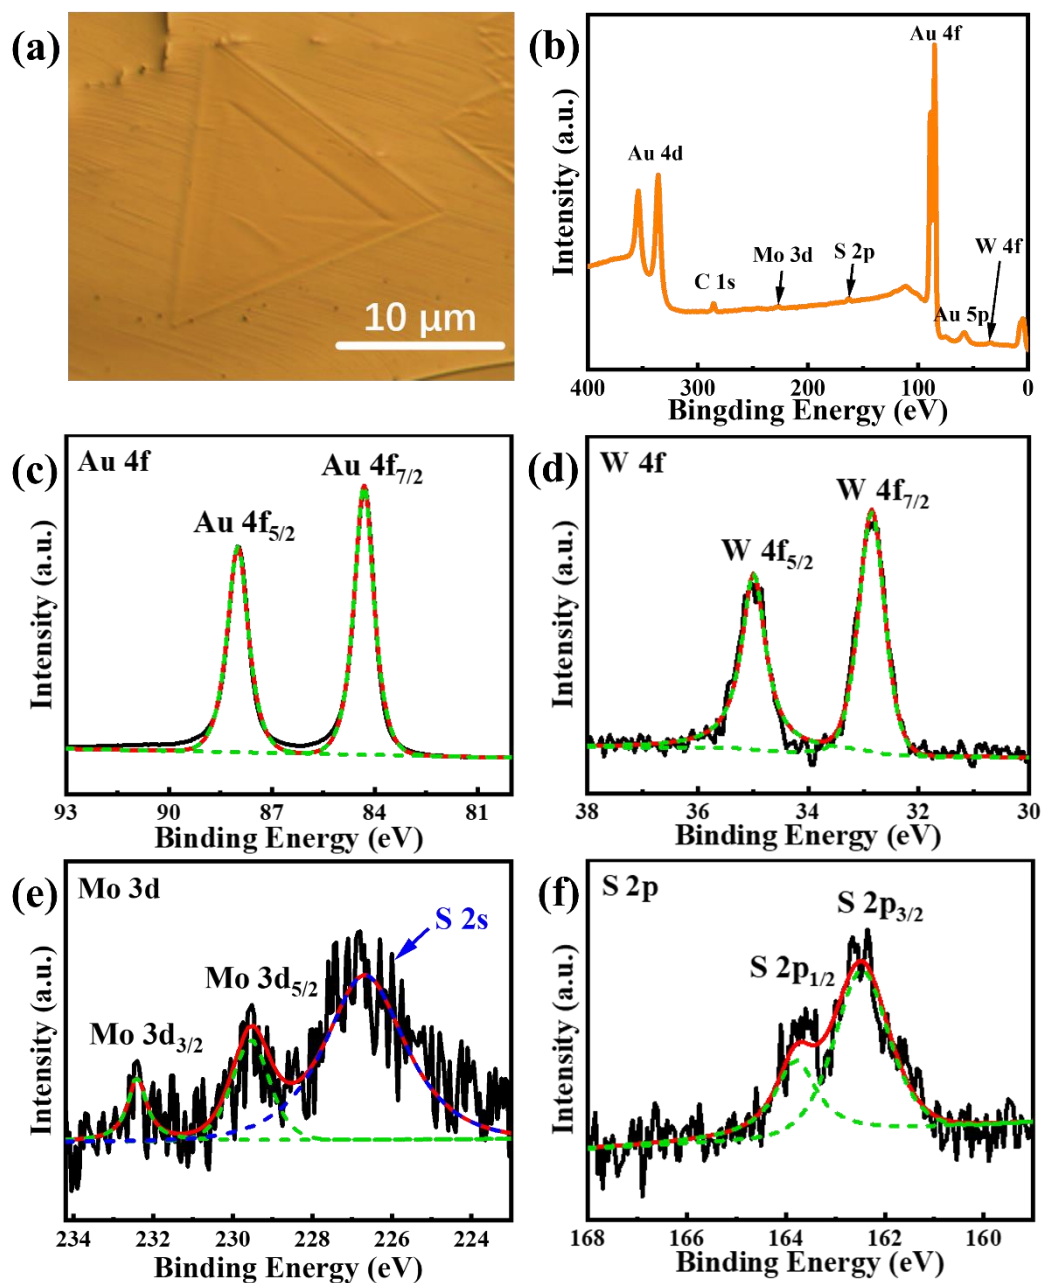

**Figure S3.** (a) Optical microscopic image of the CVD-grown  $\text{MoS}_2/\text{WS}_2$  LH on Au foil. (b) XPS spectrum of the heterojunction in (a). (c–f) XPS spectra of Au 4f (c), W 4f (d), Mo 3d (e) and S 2p (f) orbitals, respectively.

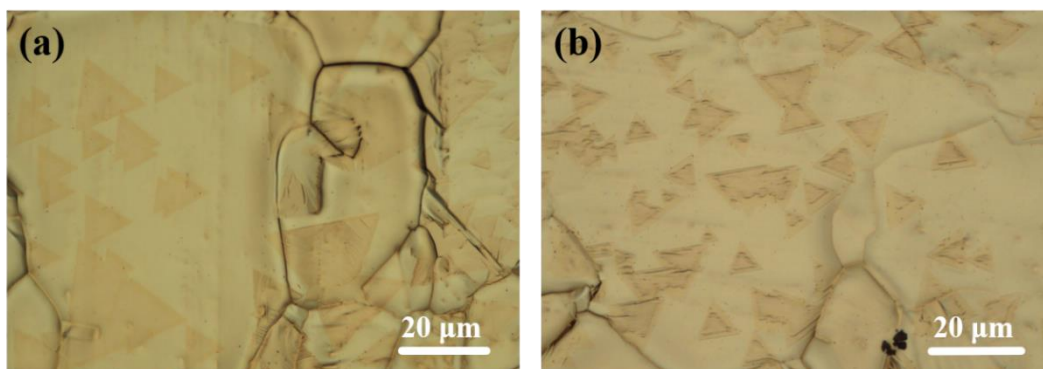

**Figure S4.** Low-magnification optical microscopic images of the as-grown (a) WS<sub>2</sub>/MoS<sub>2</sub> LHs and (b) WS<sub>2</sub>/MoS<sub>2</sub> VHs on Au foils, respectively.

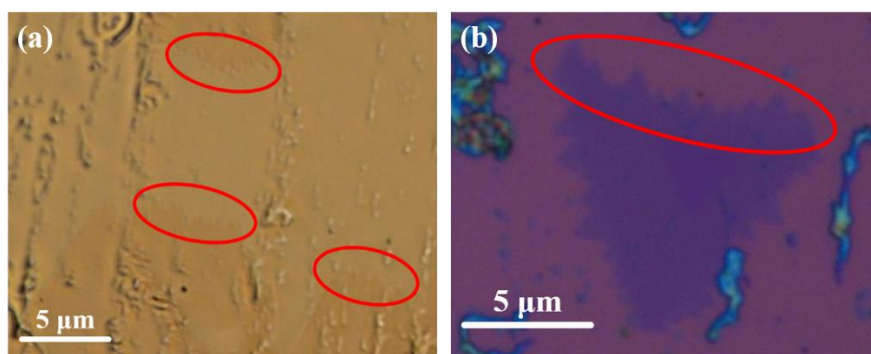

**Figure S5.** Optical microscopic images of as-growth  $\text{MoS}_2/\text{WS}_2$  VHS (a) growth on Au foils and as-transferred  $\text{MoS}_2/\text{WS}_2$  VH (b) on  $\text{SiO}_2/\text{Si}$ , respectively.

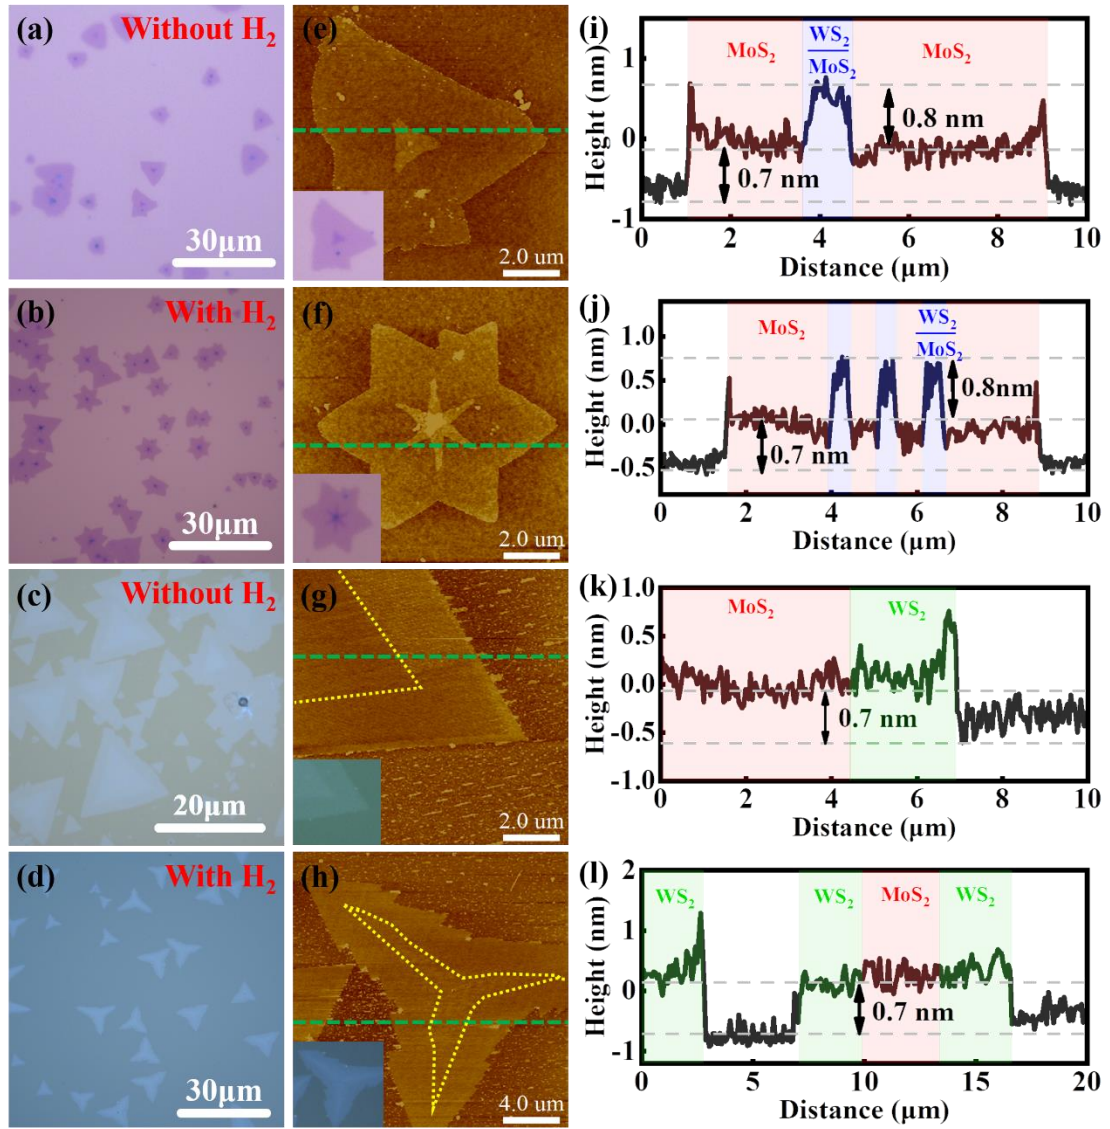

**Figure S6.** (a–d) Optical microscopic images of the synthesis LHs and VHs on SiO<sub>2</sub>/Si and c-sapphire substrates depending on whether or not hydrogen is supplied. (e–h) AFM images of as-growth MoS<sub>2</sub>/WS<sub>2</sub> LH and VH domains corresponding to (a–d). (i–l) AFM profiles along green dash line in (e–h), respectively.
